# Supplementary material for: Effect of Nanopatterning on Concentration Polarization during Nanofiltration
Source: Membranes (Basel). 2021 Dec 7;11(12):961. doi: 10.3390/membranes11120961 (PMC8707940; doi:10.3390/membranes11120961)
Supplement: Supplementary file 1 [file membranes-11-00961-s001.zip › membranes-1477811-supplementary.pdf]

## Effect of Nanopatterning on Concentration Polarization during Nanofiltration

Lauren M. Ward <sup>1</sup>, Barbara G. Fickling <sup>1</sup>, and Steven T. Weinman <sup>1,\*</sup>

Department of Chemical and Biological Engineering, The University of Alabama, Tuscaloosa, AL 35487, USA

### Supporting Information

#### Permeance and Salt Rejection Data

The data in Table S1 and S2 were used to produce Figure 3, 4, and 5 in the main document.

**Table S1.** Permeance and Na<sub>2</sub>SO<sub>4</sub> Rejection values of the pristine NF270 membranes. The error represents one standard deviation from a sample size of 3 for each test.

|                  | Pristine Membrane   |                     |                |                     |                |
|------------------|---------------------|---------------------|----------------|---------------------|----------------|
|                  | Pure Water Feed     | 2,000 ppm Feed      |                | 10,000 ppm Feed     |                |
| $\Delta P$ (bar) | Permeance (LMH/bar) | Permeance (LMH/bar) | Rejection (%)  | Permeance (LMH/bar) | Rejection (%)  |
| 6.89             | 15.12 $\pm$ 0.05    | 9.29 $\pm$ 0.21     | 95.4 $\pm$ 0.4 | 5.29 $\pm$ 0.13     | 83.3 $\pm$ 1.6 |
| 10.34            | -----               | 8.79 $\pm$ 0.22     | 88.3 $\pm$ 1.0 | 5.34 $\pm$ 0.18     | 87.9 $\pm$ 0.9 |
| 13.79            | -----               | 8.13 $\pm$ 0.11     | 91.8 $\pm$ 4.7 | 4.68 $\pm$ 0.12     | 87.6 $\pm$ 1.6 |

**Table S2.** Permeance and Na<sub>2</sub>SO<sub>4</sub> Rejection values of the patterned NF270 membranes. The error represents one standard deviation from a sample size of 3 for each test.

|                  | Patterned Membrane  |                     |                |                     |                |
|------------------|---------------------|---------------------|----------------|---------------------|----------------|
|                  | Pure Water Feed     | 2,000 ppm Feed      |                | 10,000 ppm Feed     |                |
| $\Delta P$ (bar) | Permeance (LMH/bar) | Permeance (LMH/bar) | Rejection (%)  | Permeance (LMH/bar) | Rejection (%)  |
| 6.89             | 15.78 $\pm$ 1.09    | 8.95 $\pm$ 0.17     | 87.6 $\pm$ 1.4 | 5.08 $\pm$ 0.08     | 74.9 $\pm$ 4.1 |
| 10.34            | -----               | 8.55 $\pm$ 0.36     | 81.0 $\pm$ 2.6 | 4.63 $\pm$ 0.25     | 76.1 $\pm$ 3.1 |
| 13.79            | -----               | 7.78 $\pm$ 0.29     | 78.7 $\pm$ 3.2 | 4.31 $\pm$ 0.16     | 74.6 $\pm$ 2.8 |

#### Salt Flux Data

The data in Table S3 were used to produce Figure 6 in the main document.

**Table S3.** Salt flux data values for both pristine and patterned membranes. The error represents one standard deviation from a sample size of 3 for each test.

| Salt Flux (mol/m <sup>2</sup> /hr) |                 |                 |                 |                 |
|------------------------------------|-----------------|-----------------|-----------------|-----------------|
| $\Delta P$ (bar)                   | 2,000 ppm Feed  |                 | 10,000 ppm Feed |                 |
|                                    | Pristine        | Patterned       | Pristine        | Patterned       |
| 6.89                               | 0.05 $\pm$ 0.00 | 0.13 $\pm$ 0.01 | 0.16 $\pm$ 0.02 | 0.28 $\pm$ 0.05 |
| 10.34                              | 0.22 $\pm$ 0.01 | 0.35 $\pm$ 0.05 | 0.27 $\pm$ 0.01 | 0.51 $\pm$ 0.07 |
| 13.79                              | 0.31 $\pm$ 0.01 | 0.52 $\pm$ 0.07 | 0.40 $\pm$ 0.05 | 0.80 $\pm$ 0.10 |

### Concentration Polarization Data

The data in Table S3 was used to produce Figure 5 in the main document. The data in Table S4 was used to produce Figure 6 in the main document.

**Table S4.** Concentration located at the membrane surface for the pristine NF270 membranes. The error represents one standard deviation from a sample size of 3 for each test.

| Pristine Membrane |                                     |                 |
|-------------------|-------------------------------------|-----------------|
|                   | Concentration at the Membrane (ppm) |                 |
| $\Delta P$ (bar)  | 2,000 ppm Feed                      | 10,000 ppm Feed |
| 6.89              | 7029 $\pm$ 172                      | 13379 $\pm$ 288 |
| 10.34             | 10493 $\pm$ 176                     | 17475 $\pm$ 179 |
| 13.79             | 14639 $\pm$ 334                     | 22723 $\pm$ 90  |

**Table S5.** Concentration located at the membrane surface for the patterned NF270 membranes. The error represents one standard deviation from a sample size of 3 for each test.

| Patterned Membrane |                                     |                 |
|--------------------|-------------------------------------|-----------------|
|                    | Concentration at the Membrane (ppm) |                 |
| $\Delta P$ (bar)   | 2,000 ppm Feed                      | 10,000 ppm Feed |
| 6.89               | 7604 $\pm$ 153                      | 13953 $\pm$ 110 |
| 10.34              | 11040 $\pm$ 155                     | 18856 $\pm$ 244 |
| 13.79              | 15847 $\pm$ 236                     | 24298 $\pm$ 265 |

### Results from Paired Two sample t-test for Means

Hypothesis testing was done to determine statistical relevance of the data sets. EXCEL (Microsoft O365 Version 1908) was used for all statistical analyses. All tests were done using 90% confidence ( $\alpha = 0.10$ ); therefore, if the p-value is greater than  $\alpha$  then the means are considered to be equal and if the p-value is less than  $\alpha$  then the means are considered to be unequal.

Table S5 shows the results from the statistical tests on the pure water permeance data from Figures 3 and 4 in the main document (also Tables S1 and S2). Table S6 and S7 show the results from the statistical tests on the permeance and salt rejection data from Figure 3 in the main document (also Table S1) for the 2,000 ppm Na<sub>2</sub>SO<sub>4</sub> feed and from Figure 4 in the main document (also Table S2) for the 10,000 ppm Na<sub>2</sub>SO<sub>4</sub> feed. Table S8 and S9 show the results from the statistical tests on the calculated Na<sub>2</sub>SO<sub>4</sub> concentration at the membrane surface from Figure 5 (also Table S3) for the 2,000 ppm Na<sub>2</sub>SO<sub>4</sub> feed and Figure 6 (also Table S4) for the 10,000 ppm Na<sub>2</sub>SO<sub>4</sub> feed in the main document.

**Table S6.** Results of paired two sample t-test for the pure water feed solution.

| Pure Water Feed  |              |              |               |                    |                                 |
|------------------|--------------|--------------|---------------|--------------------|---------------------------------|
| $\Delta P$ (bar) | Group 1 Data | Group 2 Data | Test Variable | Two-Tailed P Value | Interpretation (95% Confidence) |
| 6.89             | Pristine     | Patterned    | Permeance     | 0.354              | Not statistically significant   |

**Table S7.** Results of paired two sample t-test for the 2,000 ppm Na<sub>2</sub>SO<sub>4</sub> feed solution.

| 2,000 ppm Feed   |              |              |                                           |                    |                                 |
|------------------|--------------|--------------|-------------------------------------------|--------------------|---------------------------------|
| $\Delta P$ (bar) | Group 1 Data | Group 2 Data | Test Variable                             | Two-Tailed P Value | Interpretation (95% Confidence) |
| 6.89             | Pristine     | Patterned    | Permeance                                 | 0.244              | Not statistically significant   |
| 10.34            | Pristine     | Patterned    | Permeance                                 | 0.528              | Not statistically significant   |
| 13.79            | Pristine     | Patterned    | Permeance                                 | 0.143              | Not statistically significant   |
| 6.89             | Pristine     | Patterned    | Na <sub>2</sub> SO <sub>4</sub> Rejection | 0.011              | Statistically significant       |
| 10.34            | Pristine     | Patterned    | Na <sub>2</sub> SO <sub>4</sub> Rejection | 0.037              | Statistically significant       |
| 13.79            | Pristine     | Patterned    | Na <sub>2</sub> SO <sub>4</sub> Rejection | 0.020              | Statistically significant       |
| 6.89             | Pristine     | Patterned    | Na <sub>2</sub> SO <sub>4</sub> Flux      | 0.016              | Statistically significant       |
| 10.34            | Pristine     | Patterned    | Na <sub>2</sub> SO <sub>4</sub> Flux      | 0.058              | Statistically significant       |
| 13.79            | Pristine     | Patterned    | Na <sub>2</sub> SO <sub>4</sub> Flux      | 0.053              | Statistically significant       |

**Table S8.** Results of paired two sample t-test for the 10,000 ppm Na<sub>2</sub>SO<sub>4</sub> feed solution.

| 10,000 ppm Feed  |              |              |                                           |                    |                                 |
|------------------|--------------|--------------|-------------------------------------------|--------------------|---------------------------------|
| $\Delta P$ (bar) | Group 1 Data | Group 2 Data | Test Variable                             | Two-Tailed P Value | Interpretation (95% Confidence) |
| 6.89             | Pristine     | Patterned    | Permeance                                 | 0.213              | Not statistically significant   |
| 10.34            | Pristine     | Patterned    | Permeance                                 | 0.099              | Statistically significant       |
| 13.79            | Pristine     | Patterned    | Permeance                                 | 0.032              | Statistically significant       |
| 6.89             | Pristine     | Patterned    | Na <sub>2</sub> SO <sub>4</sub> Rejection | 0.055              | Statistically significant       |
| 10.34            | Pristine     | Patterned    | Na <sub>2</sub> SO <sub>4</sub> Rejection | 0.025              | Statistically significant       |
| 13.79            | Pristine     | Patterned    | Na <sub>2</sub> SO <sub>4</sub> Rejection | 0.020              | Statistically significant       |
| 6.89             | Pristine     | Patterned    | Na <sub>2</sub> SO <sub>4</sub> Flux      | 0.070              | Statistically significant       |
| 10.34            | Pristine     | Patterned    | Na <sub>2</sub> SO <sub>4</sub> Flux      | 0.045              | Statistically significant       |
| 13.79            | Pristine     | Patterned    | Na <sub>2</sub> SO <sub>4</sub> Flux      | 0.036              | Statistically significant       |

**Table S9.** Results of paired two sample t-test for the 2,000 ppm Na<sub>2</sub>SO<sub>4</sub> feed solution.

| 2,000 ppm Feed   |              |              |                                                           |                    |                                 |
|------------------|--------------|--------------|-----------------------------------------------------------|--------------------|---------------------------------|
| $\Delta P$ (bar) | Group 1 Data | Group 2 Data | Test Variable                                             | Two-Tailed P Value | Interpretation (95% Confidence) |
| 6.89             | Pristine     | Patterned    | Na <sub>2</sub> SO <sub>4</sub> Concentration at Membrane | 0.088              | Statistically significant       |
| 10.34            | Pristine     | Patterned    | Na <sub>2</sub> SO <sub>4</sub> Concentration at Membrane | 0.094              | Statistically significant       |
| 13.79            | Pristine     | Patterned    | Na <sub>2</sub> SO <sub>4</sub> Concentration at Membrane | 0.002              | Statistically significant       |

**Table S10.** Results of paired two sample t-test for the 10,000 ppm Na<sub>2</sub>SO<sub>4</sub> feed solution.

| 10,000 ppm Feed  |              |              |                                                           |                    |                                 |
|------------------|--------------|--------------|-----------------------------------------------------------|--------------------|---------------------------------|
| $\Delta P$ (bar) | Group 1 Data | Group 2 Data | Test Variable                                             | Two-Tailed P Value | Interpretation (95% Confidence) |
| 6.89             | Pristine     | Patterned    | Na <sub>2</sub> SO <sub>4</sub> Concentration at Membrane | 0.000              | Statistically significant       |
| 10.34            | Pristine     | Patterned    | Na <sub>2</sub> SO <sub>4</sub> Concentration at Membrane | 0.030              | Statistically significant       |
| 13.79            | Pristine     | Patterned    | Na <sub>2</sub> SO <sub>4</sub> Concentration at Membrane | 0.017              | Statistically significant       |
